# Supplementary material for: Nutritional Composition of Honey Bee Drones of Two Subspecies Relative to Their Pupal Developmental Stages
Source: MDPI journal article supplement (doi:10.3390/insects12080759), 2021-08-23
Supplement: s1 [file s1]

**Table S1.** Alignment report of *Apis mellifera carnica* (AMC) and *Apis mellifera mellifera* (AMM) COI gene.

|          |                                                                                     |     |     |     |     |     |     |     |  |  |     |
|----------|-------------------------------------------------------------------------------------|-----|-----|-----|-----|-----|-----|-----|--|--|-----|
| Majority | -----GTTTCATCAATGAGACTTATTATTTCGAATAGAAATTAAGATCTCCAGGATCATGAATTAATAACGATCAAATTTATA |     |     |     |     |     |     |     |  |  |     |
|          | -----+-----+-----+-----+-----+-----+-----+-----+-----+-----+                        |     |     |     |     |     |     |     |  |  |     |
|          | 10                                                                                  | 20  | 30  | 40  | 50  | 60  | 70  | 80  |  |  |     |
|          | -----+-----+-----+-----+-----+-----+-----+-----+-----+-----+                        |     |     |     |     |     |     |     |  |  |     |
| AMC_1    | -----ATCAATGAGACTTATTATTTCGAATAGAAATTAAGATCCCCAGGATCATGAATTAGCAATGATCAAATTTATA      |     |     |     |     |     |     |     |  |  | 71  |
| AMC_2    | ACTAGGATCATCAATGAGACTTATTATTTCGAATAGAAATTAAGATCCCCAGGATCATGAATTAACAATGATCAAATTTATA  |     |     |     |     |     |     |     |  |  | 80  |
| AMM_1    | ---AGGTTTCATCAATGAGACTTATTATTTCGAATAGAAATTAAGATCTCCAGGATCATGAATTAATAACGATCAAATTTATA |     |     |     |     |     |     |     |  |  | 77  |
| AMM_2    | ----GTTTCATCAATGAGACTTATTATTTCGAATAGAAATTAAGATCTCCAGGATCATGAATTAATAACGATCAAATTTATA  |     |     |     |     |     |     |     |  |  | 75  |
| AMM_3    | -----TCATCAATGAGACTTATTATTTCGAATAGAAATTAAGATCTCCAGGATCATGAATTAATAACGATCAAATTTATA    |     |     |     |     |     |     |     |  |  | 73  |
|          |                                                                                     |     |     |     |     |     |     |     |  |  |     |
| Majority | ATACAATTGTTACTAGCCACGCATTTCTAATAATCTTTTTTATAGTTATAACCATTTCTAATTGGAGGATTTGGAAATTGG   |     |     |     |     |     |     |     |  |  |     |
|          | -----+-----+-----+-----+-----+-----+-----+-----+-----+-----+                        |     |     |     |     |     |     |     |  |  |     |
|          | 90                                                                                  | 100 | 110 | 120 | 130 | 140 | 150 | 160 |  |  |     |
|          | -----+-----+-----+-----+-----+-----+-----+-----+-----+-----+                        |     |     |     |     |     |     |     |  |  |     |
| AMC_1    | ATACAATTGTTACTAGTCATGCATTCCCTAATAATTTTTTTTATAGTTATAACCATTTTAAATTGGAGGATTTGGAAATTGG  |     |     |     |     |     |     |     |  |  | 151 |
| AMC_2    | ATACAATTGTTACTAGTCATGCATTCCCTAATAATTTTTTTTATAGTTATAACCATTTTAAATTGGAGGATTTGGAAATTGG  |     |     |     |     |     |     |     |  |  | 160 |
| AMM_1    | ATACAATTGTTACTAGCCACGCATTTCTAATAATCTTTTTTATAGTTATAACCATTTCTAATTGGAGGATTTGGAAATTGG   |     |     |     |     |     |     |     |  |  | 157 |
| AMM_2    | ATACAATTGTTACTAGCCACGCATTTCTAATAATCTTTTTTATAGTTATAACCATTTCTAATTGGAGGATTTGGAAATTGG   |     |     |     |     |     |     |     |  |  | 155 |
| AMM_3    | ATACAATTGTTACTAGCCACGCATTTCTAATAATCTTTTTTATAGTTATAACCATTTCTAATTGGAGGATTTGGAAATTGG   |     |     |     |     |     |     |     |  |  | 153 |
|          |                                                                                     |     |     |     |     |     |     |     |  |  |     |
| Majority | CTTATTCCTTTAATACTAGGATCACCTGATATAGCATTTCCCCGAATAAATAATGTTAGATTTTGATTACTTCCTCCCTC    |     |     |     |     |     |     |     |  |  |     |
|          | -----+-----+-----+-----+-----+-----+-----+-----+-----+-----+                        |     |     |     |     |     |     |     |  |  |     |
|          | 170                                                                                 | 180 | 190 | 200 | 210 | 220 | 230 | 240 |  |  |     |
|          | -----+-----+-----+-----+-----+-----+-----+-----+-----+-----+                        |     |     |     |     |     |     |     |  |  |     |
| AMC_1    | CTTATTCCTTTAATACTAGGATCACCTGATATAGCATTTCCCCGAATAAATAATATTAGATTTTGATTACTTCCTCCCTC    |     |     |     |     |     |     |     |  |  | 231 |
| AMC_2    | CTTATTCCTTTAATACTAGGATCACCTGATATAGCATTTCCCCGAATAAATAATATTAGATTTTGATTACTTCCTCCCTC    |     |     |     |     |     |     |     |  |  | 240 |
| AMM_1    | CTTATTCCTTTAATACTAGGATCACCTGATATAGCATTTCCCCGAATAAATAATGTTAGATTTTGATTACTTCCTCCCTC    |     |     |     |     |     |     |     |  |  | 237 |
| AMM_2    | CTTATTCCTTTAATACTAGGATCACCTGATATAGCATTTCCCCGAATAAATAATGTTAGATTTTGATTACTTCCTCCCTC    |     |     |     |     |     |     |     |  |  | 235 |
| AMM_3    | CTTATTCCTTTAATACTAGGATCACCTGATATAGCATTTCCCCGAATAAATAATGTTAGATTTTGATTACTTCCTCCCTC    |     |     |     |     |     |     |     |  |  | 233 |
|          |                                                                                     |     |     |     |     |     |     |     |  |  |     |
| Majority | ATTATTAATACTTTTATTAAGAAATTTATTTTACCCAAGACCAGGAAGTGGATGAACAGTATATCCACCATTATCAGCAT    |     |     |     |     |     |     |     |  |  |     |

|       |                                                                                  |     |
|-------|----------------------------------------------------------------------------------|-----|
|       | -----+-----+-----+-----+-----+-----+                                             |     |
|       | 250       260       270       280       290       300                            |     |
|       | -----+-----+-----+-----+-----+-----+                                             |     |
| AMC_1 | ATTATTTATACTTTTATTAAGAAATTTATTTTATCCAAGACCAGGAAGTGGATGAACAGTATATCCACCATTATCAGCAT | 311 |
| AMC_2 | ATTATTTATACTTTTATTAAGAAATTTATTTTATCCAAGACCAGGAAGTGGATGAACAGTATATCCACCATTATCAGCAT | 320 |
| AMM_1 | ATTATTAATACTTTTATTAAGAAATTTATTTTACCCAAGACCAGGAAGTGGATGAACAGTATATCCACCATTATCAGCAT | 317 |
| AMM_2 | ATTATTAATACTTTTATTAAGAAATTTATTTTACCCAAGACCAGGAAGTGGATGAACAGTATATCCACCATTATCAGCAT | 315 |
| AMM_3 | ATTATTAATACTTTTATTAAGAAATTTATTTTACCCAAGACCAGGAAGTGGATGAACAGTATATCCACCATTATCAGCAT | 313 |

|          |                                                                                  |     |     |     |     |     |     |     |  |  |     |
|----------|----------------------------------------------------------------------------------|-----|-----|-----|-----|-----|-----|-----|--|--|-----|
| Majority | TTAAATTTAATAGTTACAATTATAATAATAAAAAATTTTTCTATAAAATTATGACCAAATTCATTATTTCCATGATCAGT |     |     |     |     |     |     |     |  |  |     |
|          | -----+-----+-----+-----+-----+-----+-----+                                       |     |     |     |     |     |     |     |  |  |     |
|          | 410                                                                              | 420 | 430 | 440 | 450 | 460 | 470 | 480 |  |  |     |
|          | -----+-----+-----+-----+-----+-----+-----+                                       |     |     |     |     |     |     |     |  |  |     |
| AMC_1    | TTAAACTTAATAGTTACAATTATAATAATAAAAAATTTTTCTATAAAATTATGACCAAATTCATTATTTCCATGATCAGT |     |     |     |     |     |     |     |  |  | 471 |
| AMC_2    | TTAAACTTAATAGTTACAATTATAATAATAAAAAATTTTTCTATAAAATTATGACCAAATTCATTATTTCCATGATCAGT |     |     |     |     |     |     |     |  |  | 480 |
| AMM_1    | TTAAATTTAATAGTTACAATTATAATAATAAAAAATTTTTCTATAAAATTATGACCAAATTCATTATTTCCATGATCAGT |     |     |     |     |     |     |     |  |  | 477 |
| AMM_2    | TTAAATTTAATAGTTACAATTATAATAATAAAAAATTTTTCTATAAAATTATGACCAAATTCATTATTTCCATGATCAGT |     |     |     |     |     |     |     |  |  | 475 |
| AMM_3    | TTAAATTTAATAGTTACAATTATAATAATAAAAAATTTTTCTATAAAATTATGACCAAATTCATTATTTCCATGATCAGT |     |     |     |     |     |     |     |  |  | 473 |

|       |                                                                                  |     |
|-------|----------------------------------------------------------------------------------|-----|
| AMC_2 | TTTTATTACAGCAATTTTATTAATTATATCATTACCTGTATTAGCTGGAGCAATTACTATACTATTATTTGATCGAAATT | 560 |
| AMM_1 | TTTTATTACAGCAATTTTATTAATTATATCATTACCTGTATTAGCTGGAGCAATTACTATACTATTATTTGATCGAAATT | 557 |
| AMM_2 | TTTTATTACAGCAATTTTATTAATTATATCATTACCTGTATTAGCTGGAGCAATTACTATACTATTATTTGATCGAAATT | 555 |
| AMM_3 | TTTTATTACAGCAATTTTATTAATTATATCATTACCTGTATTAGCTGGAGCAATTACTATACTATTATTTGATCGAAATT | 553 |

Majority TTAATACATCATTTTTTTGATCCTATAGGAGGTGGAGATCCAATTTTATATCAACATTTATTTTGATTTTT-----

-----+-----+-----+-----+-----+-----+-----+-----+  
570      580      590      600      610      620      630      640  
-----+-----+-----+-----+-----+-----+-----+-----+

|       |                                                                                    |     |
|-------|------------------------------------------------------------------------------------|-----|
| AMC_1 | TTAATACATCATTTCTA---GCTTTATGATCTGGA-----ATACTAGGAT-----C-----                      | 593 |
| AMC_2 | TTAATACATCATTTTTTCGATCCTATAGGAGGTGGAGATCCAATTTCTTTATCAACATTTATTTTGATTTTT-----      | 630 |
| AMM_1 | TTAATACATCATTTTTTTGATCCTATAGGAGGTGGAGATCCAATTTTATATCAACATTTATTTTGATTTTT-----       | 627 |
| AMM_2 | TTAATACATCATTTTTTTGATCCTATAGGAGGTGGAGATCCAATTTTATATCAACATTTATTTTGATTTTTTTTATATTATT | 635 |
| AMM_3 | TTAATACATCATTTTTTTGATCCTATAGGAGGTGGAGATCCAATTTTATATCAACATTTATTTTGATTTTT-----       | 623 |

Majority -----CATCAATGAGACTTATTATTCTGAATAGAATTAAGATCC-CCAGGATCATGAA

-----+-----+-----+-----+-----+-----+-----+-----+  
650      660      670      680      690      700      710      720  
-----+-----+-----+-----+-----+-----+-----+-----+

|       |                                                                                 |     |
|-------|---------------------------------------------------------------------------------|-----|
| AMC_1 | -----ATCAATGAGACTTATTATTCTGAATAGAATTAAGATCC-CCAGGATCATGAA                       | 643 |
| AMC_2 | -----CATCAATGAGACTTATTATTCTGAATAGAATTAAGATCC-CCAGGATCATGAA                      | 681 |
| AMM_1 | -----TATCAATGAGACTTATTATTCTGAATAGAATTAAGATCC-CCAGGATCATGAA                      | 678 |
| AMM_2 | CTAGCTTTATGATCTGGAATATTAGGTTTCAATGAGACTTATTATTCTGAATAGAATTAAGATCT-CCAGGATCATGAA | 714 |
| AMM_3 | -----TGGAGCTAGTTTATTATTATATCATTAAACGAGGTCGATTATGTCCATTAC                        | 673 |

Majority TTAACAATGATCAAATTTATAATACAATTGTTACTAGTCATGCATTCCTAATAATTTTTTTTATAGTTATACCATTTTAA

-----+-----+-----+-----+-----+-----+-----+-----+  
730      740      750      760      770      780      790      800  
-----+-----+-----+-----+-----+-----+-----+-----+

|       |                                                                                  |     |
|-------|----------------------------------------------------------------------------------|-----|
| AMC_1 | TTAGCAATGATCAAATTTATAATACAATTGTTACTAGTCATGCATTCCTAATAATTTTTTTTATAGTTATACCATTTTAA | 723 |
| AMC_2 | TTAACAATGATCAAATTTATAATACAATTGTTACTAGTCATGCATTCCTAATAATTTTTTTTATAGTTATACCATTTTAA | 761 |
| AMM_1 | TTAGCAATGATCAAATTTATAATACAATTGTTACTAGTCATGCATTCCTAATAATTTTTTTTATAGTTATACCATTTTAA | 758 |
| AMM_2 | TTAATAACGATCAAATTTATAATACAATTGTTACTAGCCACGCATTTCTAATAATCTTTTTTATAGTTATACCATTCTA  | 794 |
| AMM_3 | T--ATATTAATTA--TTT-TAACGACATTATTTTTGACTA-GTACCTTTATTACTTTAAACCAGTATTAAAT-ATCTTT- | 745 |

Majority ATTGGAGGATTTGGAAATTGGC-TTATTCCTTTAA--TACTAGGAT--CACCTGATATAGCATTCCCCCGAATAAATAAT

-----+-----+-----+-----+-----+-----+-----+  
810 820 830 840 850 860 870 880  
-----+-----+-----+-----+-----+-----+-----+

|       |                                                                                  |     |
|-------|----------------------------------------------------------------------------------|-----|
| AMC_1 | ATTGGAGGATTTGGAAATTGGC-TTATTCCTTTAA--TACTAGGAT--CACCTGATATAGCATTCCCCCGAATAAATAAT | 798 |
| AMC_2 | ATTGGAGGATTTGGAAATTGGC-TTATTCCTTTAA--TACTAGGAT--CACCTGATATAGCATTCCCCCGAATAAATAAT | 836 |
| AMM_1 | ATTGGAGGATTTGGAAATTGGC-TTATTCCTTTAA--TACTAGGAT--CACCTGATATAGCATTCCCCCGAATAAATAAT | 833 |
| AMM_2 | ATTGGAGGATTTGGAAATTGGC-TTATTCCTTTAA--TACTAGGAT--CACCTGATATAGCATTCCCCCGAATAAATAAT | 869 |
| AMM_3 | -TTAAAAAATAATAATATTAACATTGATAATTTAAATTACTAGGATATTAACCTCTTTAAGGACTATATACTTCTCTTTT | 824 |

Majority ATTAGATTTT-GATTACTTCC---TCCCTCATTATTTATACTTTTATTAAGAAATTTATTTTATCCAAGACCAGGAACTG

-----+-----+-----+-----+-----+-----+-----+  
890 900 910 920 930 940 950 960  
-----+-----+-----+-----+-----+-----+-----+

|       |                                                                                  |     |
|-------|----------------------------------------------------------------------------------|-----|
| AMC_1 | ATTAGATTTT-GATTACTTCC---TCCCTCATTATTTATACTTTTATTAAGAAATTTATTTTATCCAAGACCAGGAACTG | 874 |
| AMC_2 | ATTAGATTTT-GATTACTTCC---TCCCTCATTATTTATACTTTTATTAAGAAATTTATTTTATCCAAGACCAGGAACTG | 912 |
| AMM_1 | ATTAGATTTT-GATTACTTCC---TCCCTCATTATTTATACTTTTATTAAGAAATTTATTTTATCCAAGACCAGGAACTG | 909 |
| AMM_2 | GTTAGATTTT-GATTACTTCC---TCCCTCATTATTAATACTTTTATTAAGAAATTTATTTTACCCAAGACCAGGAACTG | 945 |
| AMM_3 | TTAACGTTTTAGATGACTTCCACTTCTTACTATATTTATACGACTATTACCACCTATATGACAAGTAGGTCAAGGACCAG | 904 |

Majority GATGAACAGTATATCCACCATTATCAGCATATTTATATCATTCTTCACCTTCAGT---AGATTTTG-CAATTTTTTCTCT

-----+-----+-----+-----+-----+-----+-----+  
970 980 990 1000 1010 1020 1030 1040  
-----+-----+-----+-----+-----+-----+-----+

|       |                                                                                  |      |
|-------|----------------------------------------------------------------------------------|------|
| AMC_1 | GATGAACAGTATATCCACCATTATCAGCATATTTATATCATTCTTCACCTTCAGT---AGATTTTG-CAATTTTTTCTCT | 950  |
| AMC_2 | GATGAACAGTATATCCACCATTATCAGCATATTTATATCATTCTTCACCTTCAGT---AGATTTTG-CAATTTTTTCTCT | 988  |
| AMM_1 | GATGAACAGTATATCCACCATTATCAGCATATTTATATCATTCTTCACCTTCAGT---AGATTTTG-CAATTTTTTCTCT | 985  |
| AMM_2 | GATGAACAGTATATCCACCATTATCAGCATATTTATATCATTCTTCACCTTCAGT---AGATTTTG-CAATTTTTTCTCT | 1021 |
| AMM_3 | AACCCATTTTATTTAAAGAATTATTTTCATAATTACTCCCTCCTTCATTAGTTTTAGATTGTAATAAATAAGCCCTT    | 984  |

Majority TCAT-ATAT---CAGGAATTCCTCAATTATAGGATCA-TTAAA--CTTAATAGTT--ACAATTATAATAATAAAAAAT

-----+-----+-----+-----+-----+-----+-----+  
1050 1060 1070 1080 1090 1100 1110 1120

|       |                                                                                 |      |
|-------|---------------------------------------------------------------------------------|------|
|       | -----+-----+-----+-----+-----+-----+-----+                                      |      |
| AMC_1 | TCAT-ATAT---CAGGAATTTCTCAATTATAGGATCA-TTAAA--CTTAATAGTT--ACAATTATAATAATAAAAAAAT | 1020 |
| AMC_2 | TCAT-ATAT---CAGGAATTTCTCAATTATAGGATCA-TTAAA--CTTAATAGTT--ACAATTATAATAATAAAAAAAT | 1058 |
| AMM_1 | TCAT-ATAT---CAGGAATTTCTCAATTATAGGATCA-TTAAA--CTTAATAGTT--ACAATTATAATAATAAAAAAAT | 1055 |
| AMM_2 | TCAT-ATAT---CAGGAATTTCTCAATTATAGGATCA-TTAAA--TTTAATAGTT--ACAATTATAATAATAAAAAAAT | 1091 |
| AMM_3 | TTACGATATAGTCCACTAGGATCATAATTCCTTATTCGGTTAAAGGTTTAGGAGGTTAATCTTTACCATATTGATATTT | 1064 |

Majority TTTTCTATAAATTATGACCAAATTTTCATTATTTCCATGATCAGTTTTTTATTACAG-CAATTTTATTAATTA-TATCATT

|       |                                                                                   |      |
|-------|-----------------------------------------------------------------------------------|------|
|       | -----+-----+-----+-----+-----+-----+-----+                                        |      |
|       | 1130 1140 1150 1160 1170 1180 1190 1200                                           |      |
|       | -----+-----+-----+-----+-----+-----+-----+                                        |      |
| AMC_1 | TTTTCTATAAATTATGACCAAATTTTCATTATTTCCATGATCAGTTTTTTATTACAG-CAATTTTATTAATTA-TATCATT | 1098 |
| AMC_2 | TTTTCTATAAATTATGACCAAATTTTCATTATTTCCATGATCAGTTTTTTATTACAGGCAATTTTATTAATTA-TATCATT | 1137 |
| AMM_1 | TTTTCTATAAATTATGACCAAATTTTCATTATTTCCATGATCAGTTTTTTATTACAG-CAATTTTATTAATTA-TATCATT | 1133 |
| AMM_2 | TTTTCTATAAATTATGACCAAATTTTCATTATTTCCATGATCAGTTTTTTATTACAG-CAATTTTATTAATTA-TATCATT | 1169 |
| AMM_3 | TTTCTAATAATCTTTACGCACCGATCATTGTTAACATAA---TATTTAACTAG-CAAT--AATTAAGTACTAGGACCT    | 1137 |

Majority CCTGTATTAGCTGGAGCAATTACTATACTATTATTTGATCGAAATTTTAATACATCATTTTTTCGATCXTATXXXXXXXX

|       |                                                                                    |      |
|-------|------------------------------------------------------------------------------------|------|
|       | -----+-----+-----+-----+-----+-----+-----+                                         |      |
|       | 1210 1220 1230 1240 1250 1260 1270 1280                                            |      |
|       | -----+-----+-----+-----+-----+-----+-----+                                         |      |
| AMC_1 | CCTGTATTAGCTGGAGCAATTACTATACTATTA                                                  | 1131 |
| AMC_2 | CCTGTATTAGCTGGAGCAATTACTATACTATTATTTGATCGAAATTTTAATACATCATTTTTTCG                  | 1201 |
| AMM_1 | CCTGTATTAGCTGGAGCAATTACTATACTATTATTTGATCGAAATTTTAATACATCATTTGTTTCGATCCTATAGGAGGTGG | 1213 |
| AMM_2 | CCTGTATTAGCTGGAGCAATTACTATATTATTATTTGATCGAAATTTTAATACATCATTTTTTTCGATCCTATAGGAG     | 1245 |
| AMM_3 | CTAGAATTAAGATAAGC--TTATTATTCAGAGTAACTACTTGGATTATAAGGTCTAGTATTTTCGATCTTATTATATGTTC  | 1215 |
